# Supplementary material
Source: MDPI journal article supplement (https://www.mdpi.com/2297-8739/10/7/371)
Supplement: s1 [file s1]

Article

# Screening the Lipid Production Potential of Oleaginous Yeast *Yarrowia lipolytica* under Wood Hydrolysates

Hülya Ünver <sup>1</sup>, Ece Polat <sup>2</sup> and Mahmut Altınbaş <sup>1,\*</sup>

<sup>1</sup> Department of Environmental Engineering, Istanbul Technical University, 34467 Istanbul, Turkey; un-verh@itu.edu.tr

<sup>2</sup> Department of Environmental Engineering, Sinop University, 57000 Sinop, Turkey

\* Correspondence: altinbasml@itu.edu.tr; Tel.: +90 212 285 3794

## Supplementary Materials

**Table S1** Factors and responses

| Factor 1 | Factor 2 | Factor 3 | Response 1 | Response 2 | Response 3 | Response 4 | Response 5 | Response 6 |
|----------|----------|----------|------------|------------|------------|------------|------------|------------|
| A:Acid   | B:Solid  | C:Time   | Xylose     | Arabinose  | Mannose    | Glucose    | Galactose  | TSR        |
| %        | g        | min      | %          | %          | %          | %          | %          | %          |
| 72       | 88       | 10       | 85.884     | 81.9984    | 60.6902    | 59.6278    | 68.2019    | 66.5       |
| 72       | 88       | 20       | 87.0735    | 83.441     | 56.7288    | 59.225     | 70.6048    | 66.8       |
| 72       | 88       | 30       | 86.4911    | 82.5009    | 60.8039    | 62.2934    | 71.8252    | 69.1       |
| 72       | 88       | 45       | 70.0256    | 74.7077    | 55.0523    | 63.5906    | 71.3724    | 67.7       |
| 72       | 88       | 60       | 69.6242    | 70.5006    | 55.6386    | 65.4579    | 70.6235    | 68.6       |
| 72       | 146      | 10       | 75.4458    | 65.2008    | 48.718     | 58.3799    | 53.4173    | 61         |
| 72       | 146      | 20       | 77.7617    | 68.3713    | 47.6461    | 59.6632    | 56.5751    | 62.8       |
| 72       | 146      | 30       | 78.1586    | 73.6046    | 55.9853    | 61.1811    | 59.0493    | 64.6       |
| 72       | 146      | 45       | 77.8036    | 76.5299    | 53.3468    | 62.4374    | 57.6254    | 65.3       |
| 72       | 146      | 60       | 75.6279    | 74.1501    | 45.9938    | 62.4786    | 56.2926    | 64.7       |
| 75       | 88       | 10       | 96.5034    | 88.732     | 96.75      | 64.738     | 84.2735    | 74.4381    |
| 75       | 88       | 20       | 93.098     | 89.6       | 67.3911    | 62.6105    | 82.6347    | 72.3235    |
| 75       | 88       | 30       | 90.5149    | 93.1807    | 72.7463    | 67.5097    | 85.2091    | 76.0518    |
| 75       | 88       | 45       | 73.2768    | 71.1189    | 49.9432    | 71.7211    | 73.7217    | 73.9168    |
| 75       | 88       | 60       | 69.9611    | 71.3789    | 52.1395    | 74.7427    | 76.0392    | 76.0791    |
| 75       | 146      | 10       | 78.7904    | 69.3231    | 23.5408    | 74.9463    | 59.069     | 73.8568    |
| 75       | 146      | 20       | 81.5814    | 69.502     | 33.5582    | 76.0427    | 61.079     | 75.2972    |
| 75       | 146      | 30       | 82.5658    | 91.1132    | 48.6011    | 76.4729    | 71.8114    | 78.7132    |
| 75       | 146      | 45       | 81.3606    | 78.389     | 46.6263    | 76.7677    | 74.3835    | 78.6793    |
| 75       | 146      | 60       | 74.2808    | 78.3503    | 41.282     | 75.5563    | 70.0463    | 76.2824    |
| 75       | 234      | 10       | 89.4317    | 92.628     | 66.0454    | 54.283     | 63.0235    | 62.7141    |
| 75       | 234      | 20       | 71.1307    | 74.2994    | 28.0973    | 54.8666    | 49.6821    | 57.7945    |
| 75       | 234      | 30       | 78.265     | 77.21      | 31.4212    | 51.4776    | 61.4067    | 58.5614    |
| 75       | 234      | 45       | 73.9466    | 73.4777    | 42.5779    | 48.1394    | 51.1465    | 53.7445    |
| 75       | 234      | 60       | 65.0747    | 68.4976    | 29.2905    | 50.9797    | 49.5084    | 54.1962    |
| 80       | 88       | 10       | 93.3538    | 93.2515    | 84.2486    | 80.6987    | 96.1017    | 87.4229    |
| 80       | 88       | 20       | 91.0399    | 87.3033    | 80.0573    | 80.2229    | 86.8725    | 84.8493    |
| 80       | 88       | 30       | 79.6808    | 75.2729    | 72.9254    | 85.2301    | 85.6977    | 86.2878    |
| 80       | 88       | 45       | 70.8597    | 67.7026    | 73.2639    | 77.0323    | 79.2572    | 78.1954    |
| 80       | 88       | 60       | 49.7646    | 57.0079    | 38.3233    | 75.9678    | 67.7603    | 72.5521    |
| 80       | 146      | 10       | 78.9481    | 82.3753    | 49.3044    | 76.1613    | 68.5758    | 77.1105    |
| 80       | 146      | 20       | 73.5335    | 75.4874    | 55.4834    | 76.143     | 70.2756    | 76.5312    |
| 80       | 146      | 30       | 74.8775    | 70.6823    | 35.727     | 76.7008    | 69.6922    | 76.7028    |
| 80       | 146      | 45       | 48.5896    | 48.0591    | 19.571     | 69.9469    | 56.8263    | 65.8342    |
| 80       | 146      | 60       | 45.8856    | 49.8942    | 28.8059    | 69.3566    | 60.7182    | 65.966     |
| 80       | 234      | 10       | 92.8574    | 90.1176    | 55.7727    | 75.9209    | 71.9542    | 79.4153    |
| 80       | 234      | 20       | 63.9632    | 62.1653    | 27.9216    | 70.1997    | 61.0673    | 69.088     |
| 80       | 234      | 30       | 73.295     | 68.2389    | 37.5031    | 71.7769    | 60.7528    | 71.3872    |
| 80       | 234      | 45       | 53.0129    | 56.0728    | 25.1143    | 60.8079    | 56.0266    | 60.2795    |
| 80       | 234      | 60       | 46.3612    | 50.1719    | 36.6855    | 63.8501    | 56.7875    | 61.538     |

**Table S2** ANOVA for xylose, arabinose, glucose, and galactose

| ANOVA for Xylose |                |    |             |         |           | ANOVA for Arabinose |    |             |         |           |
|------------------|----------------|----|-------------|---------|-----------|---------------------|----|-------------|---------|-----------|
| Source           | Sum of Squares | df | Mean Square | F value | P value   | Sum of Squares      | df | Mean Square | F value | P value   |
| Model            | 5474.43        | 9  | 608.27      | 16.29   | < 0.0001* | 4022.82             | 9  | 446.98      | 9.13    | < 0.0001* |
| A-Acid           | 245.86         | 1  | 245.86      | 6.58    | 0.0155    | 321.56              | 1  | 321.56      | 6.57    | 0.0157    |
| B-Solid          | 0.2614         | 1  | 0.2614      | 0.0070  | 0.9339    | 0.3454              | 1  | 0.3454      | 0.0071  | 0.9336    |
| C-Time           | 745.79         | 1  | 745.79      | 19.97   | 0.0001    | 900.96              | 1  | 900.96      | 18.39   | 0.0002    |
| AB               | 19.69          | 1  | 19.69       | 0.5271  | 0.4734    | 29.01               | 1  | 29.01       | 0.5923  | 0.4476    |
| AC               | 882.38         | 1  | 882.38      | 23.63   | < 0.0001  | 1032.62             | 1  | 1032.62     | 21.08   | < 0.0001  |
| BC               | 61.38          | 1  | 61.38       | 1.64    | 0.2097    | 26.94               | 1  | 26.94       | 0.5499  | 0.4641    |
| A <sup>2</sup>   | 221.81         | 1  | 221.81      | 5.94    | 0.0210    | 287.17              | 1  | 287.17      | 5.86    | 0.0217    |
| B <sup>2</sup>   | 109.76         | 1  | 109.76      | 2.94    | 0.0968    | 220.97              | 1  | 220.97      | 4.51    | 0.0420    |
| C <sup>2</sup>   | 15.56          | 1  | 15.56       | 0.4165  | 0.5236    | 0.8471              | 1  | 0.8471      | 0.0173  | 0.8962    |
| Residual         | 1120.42        | 30 | 37.35       |         |           | 1469.36             | 30 | 48.98       |         |           |
| Cor Total        | 6594.86        | 39 |             |         |           | 5492.19             | 39 |             |         |           |

  

| ANOVA for Glucose |                |    |             |         |           | ANOVA for Galactose |    |             |         |           |
|-------------------|----------------|----|-------------|---------|-----------|---------------------|----|-------------|---------|-----------|
| Source            | Sum of Squares | df | Mean Square | F value | P value   | Sum of Squares      | df | Mean Square | F value | P value   |
| Model             | 2755.66        | 9  | 306.18      | 16.18   | < 0.0001* | 4201.73             | 9  | 466.86      | 18.94   | < 0.0001* |
| A-Acid            | 93.37          | 1  | 93.37       | 4.93    | 0.0340    | 230.87              | 1  | 230.87      | 9.37    | 0.0046    |
| B-Solid           | 17.47          | 1  | 17.47       | 0.9229  | 0.3444    | 101.84              | 1  | 101.84      | 4.13    | 0.0510    |
| C-Time            | 152.25         | 1  | 152.25      | 8.05    | 0.0081    | 321.58              | 1  | 321.58      | 13.04   | 0.0011    |
| AB                | 69.30          | 1  | 69.30       | 3.66    | 0.0653    | 12.71               | 1  | 12.71       | 0.5155  | 0.4783    |
| AC                | 131.31         | 1  | 131.31      | 6.94    | 0.0132    | 340.12              | 1  | 340.12      | 13.80   | 0.0008    |
| BC                | 78.28          | 1  | 78.28       | 4.14    | 0.0509    | 13.04               | 1  | 13.04       | 0.5289  | 0.4727    |
| A <sup>2</sup>    | 81.66          | 1  | 81.66       | 4.32    | 0.0464    | 206.18              | 1  | 206.18      | 8.36    | 0.0071    |
| B <sup>2</sup>    | 357.91         | 1  | 357.91      | 18.91   | 0.0001    | 244.97              | 1  | 244.97      | 9.94    | 0.0037    |
| C <sup>2</sup>    | 0.0735         | 1  | 0.0735      | 0.0039  | 0.9507    | 8.09                | 1  | 8.09        | 0.3282  | 0.5710    |
| Residual          | 567.74         | 30 | 18.92       |         |           | 739.57              | 30 | 24.65       |         |           |
| Cor Total         | 3323.41        | 39 |             |         |           | 4941.29             | 39 |             |         |           |

\* refers to statistical “significant” results.

**Table S3** ANOVA for total sugar recovery

| Source           | Sum of Squares | df | Mean Square | F value | P value  |             |
|------------------|----------------|----|-------------|---------|----------|-------------|
| <b>Model</b>     | 2273.76        | 9  | 252.64      | 16.78   | < 0.0001 | significant |
| A-Acid           | 142.33         | 1  | 142.33      | 9.45    | 0.0045   |             |
| B-Solid          | 21.64          | 1  | 21.64       | 1.44    | 0.2400   |             |
| C-Time           | 257.47         | 1  | 257.47      | 17.10   | 0.0003   |             |
| AB               | 31.53          | 1  | 31.53       | 2.09    | 0.1582   |             |
| AC               | 252.79         | 1  | 252.79      | 16.79   | 0.0003   |             |
| BC               | 18.29          | 1  | 18.29       | 1.22    | 0.2791   |             |
| A <sup>2</sup>   | 125.82         | 1  | 125.82      | 8.36    | 0.0071   |             |
| B <sup>2</sup>   | 66.87          | 1  | 66.87       | 4.44    | 0.0435   |             |
| C <sup>2</sup>   | 1.36           | 1  | 1.36        | 0.0907  | 0.7654   |             |
| <b>Residual</b>  | 451.67         | 30 | 15.06       |         |          |             |
| <b>Cor Total</b> | 2725.44        | 39 |             |         |          |             |

Standard Xylose

R<sup>2</sup> = 0.99944

Standard Arabinose

R<sup>2</sup> = 0.99888

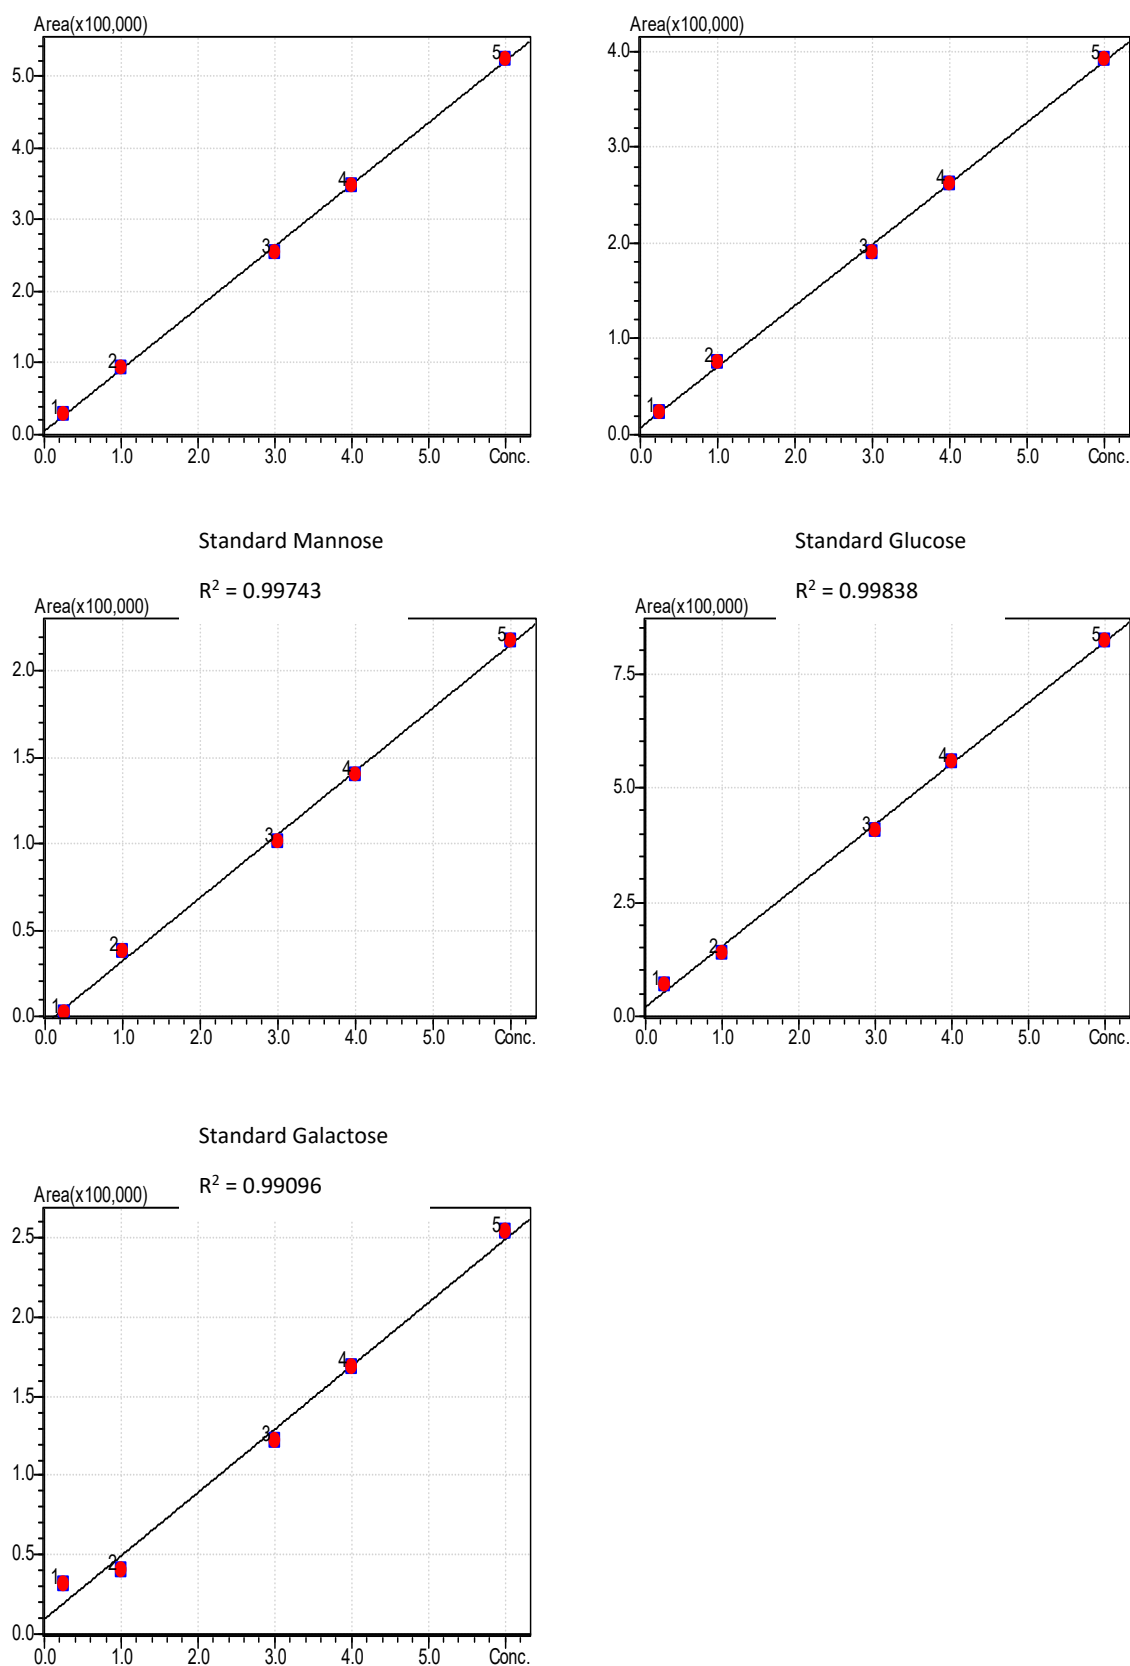

**Figure S1** Five-point calibration curve of standard sugars in HPLC by 0.25, 1, 3,4,6 mg/mL

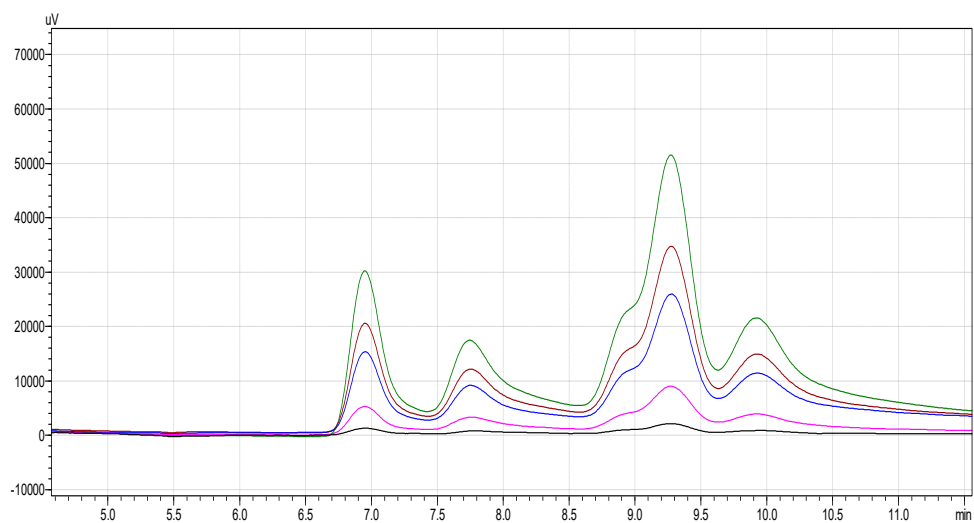

**Figure S2** HPLC spectra of the mixed standard sugars solution for calibration curve. Points are 0.25, 1, 3,4,6 mg/mL. Peaks from left: xylose, arabinose, mannose, glucose, galactose

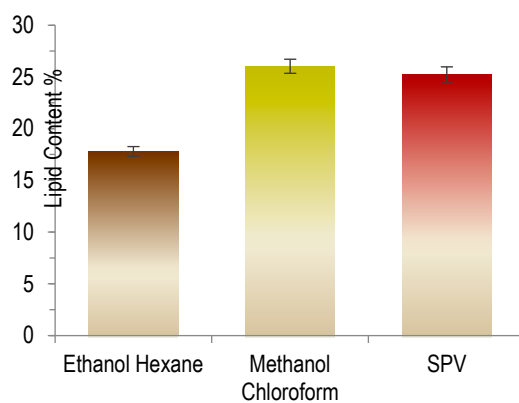

**Figure S3** Lipid extraction efficiency from *Y. lipolytica* using different methods: hexane, methanol chloroform, and Sulpho-phospho-vanillin

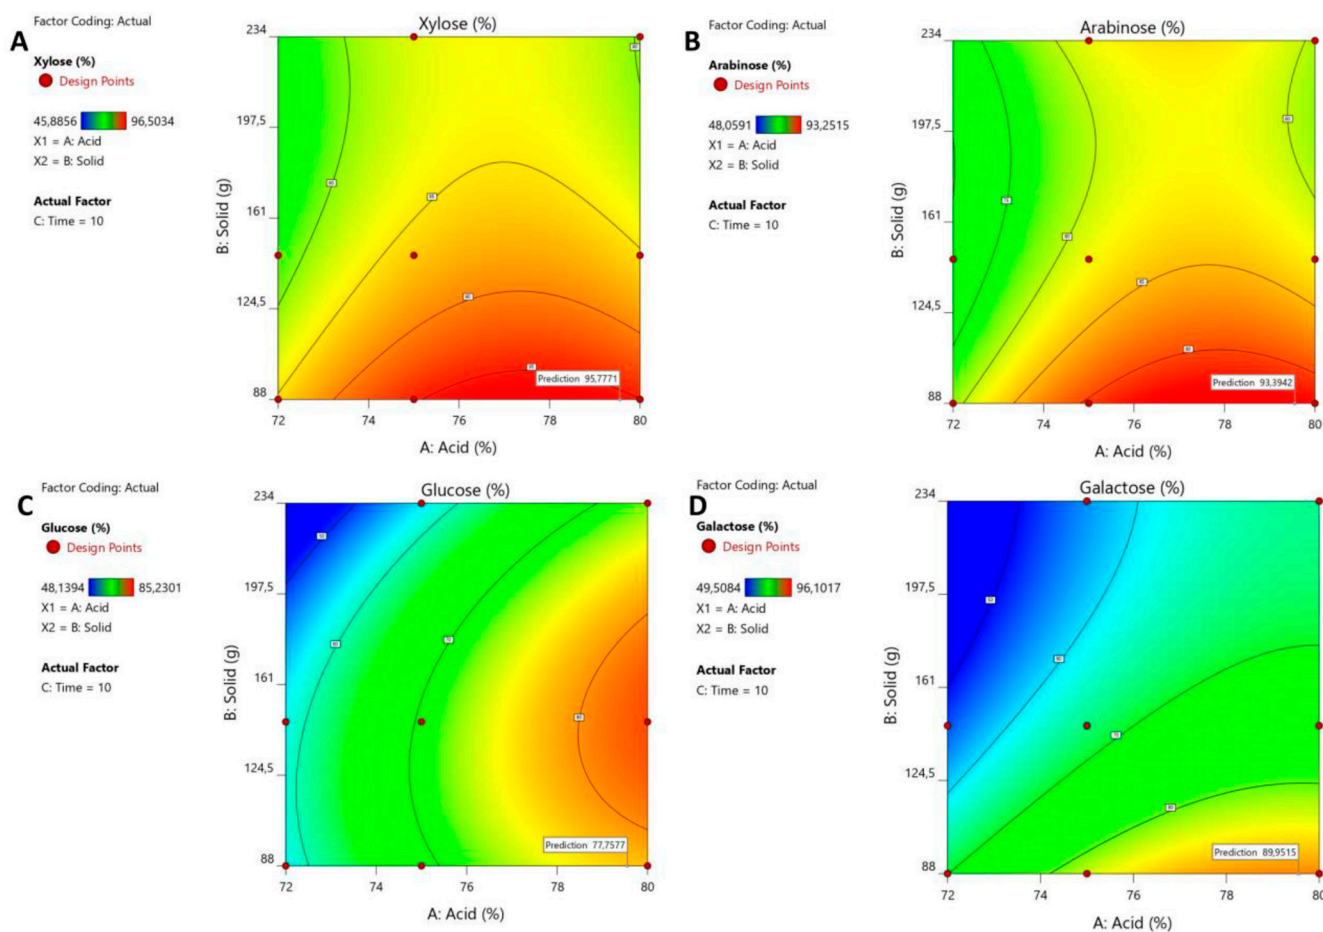

**Figure S4** Contour plots indicating the simultaneous maximum recovery of a) xylose b) arabinose c) glucose and d) galactose with respect to acid vs. solid
